# Supplementary material
Source: Springer Nature journal article supplement (https://www.springermedizin.de/resource/supplementary/40164_2012_25_MOESM1_ESM.pdf/9687028)
Supplement: MOESM1 [file 9687028]

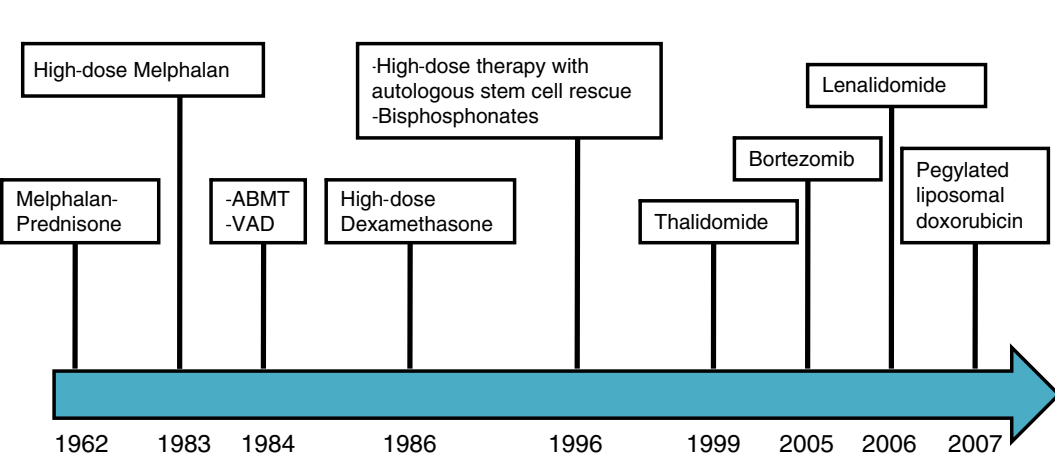

**IMiDs**

- Pomalidomide
- CC-11006

**Proteasome inhibitors**

- Carfilzomib
- MLN9708
- ONX-912

**HDAC Inhibitors**

- Vorinostat
- Panobinostat

**HSP90 Inhibitors**

- 17-AAG,
- 17-DMAG,
- AUY922

**mTOR Inhibitors**

- Everolimus

**Monoclonal Antibodies**

- Anti-IL6 antibody (e.g., CNTO 328)
- Anti-CS1 antibody (Elotuzumab)
- Anti-CD38 antibody
